# Supplementary material for: Identification and Characterization of Erwinia Phage IT22: A New Bacteriophage-Based Biocontrol against Erwinia amylovora
Source: MDPI journal article supplement (doi:10.3390/v14112455), 2022-11-05

**Table S1:** List of PCR primers used for amplifying different regions on the EP-IT22 genome. s: sense; a: antisense.

| Primers   | Sequence<br>(5' to 3')                                | Position                     | Amplicon<br>(bp) |
|-----------|-------------------------------------------------------|------------------------------|------------------|
| EP-IT22-1 | s: CACCGGTTTTTCAGCACCGCC<br>a: TCACCGCATCTGGTAAGACTT  | 1-20<br>392-412              | 412              |
| EP-IT22-2 | s: GGAGCTGATAGAGGTTTTAC<br>a: TCACCGCATCTGGTAAGACTT   | 174025-<br>174044<br>392-412 | 734              |
| EP-IT22-3 | s: CGCCTTGACAAGAGCTTCTACT<br>a: GCGAGACAGGACAATGGTTAT | 12033-12054<br>12275-12295   | 262              |
| EP-IT22-4 | s: TCAATACCCAAGTTCCCATA<br>a: CGGTTATGCAATGTACTGTGT   | 15389-15408<br>15910-15930   | 541              |
| EP-IT22-5 | s: GGTACTCTTACCGGGAATCGA<br>a: AATCGCTAATTGATCTATTCA  | 66728-66748<br>67198-67218   | 490              |
| EP-IT22-6 | s: GCATCATTCCTTCCATTACA<br>a: CAACTAGTCGAAATCAAACCA   | 73445-73465<br>73900-73920   | 475              |

**Figure S1.** Map of Apulia region (Italy), showing the geographical locations of sampling sites (S1-S6).

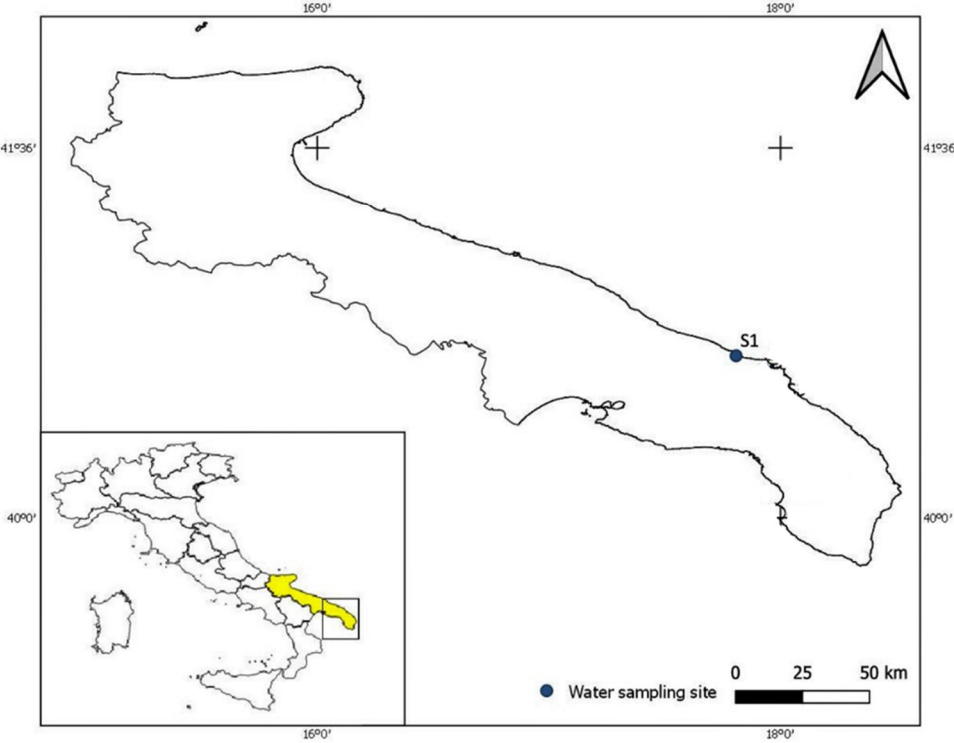

**Figure S2.** Host range analysis showing the bacteriolytic effect of phage EP-IT22 against *E. amylovora* strains after 20h of incubation at 25°C. *E. amylovora* strains were infected by phage EP-IT22 at MOI of 1. *E. amylovora* cultures without phage were used as the controls. Error bars represent standard deviations of three replications.

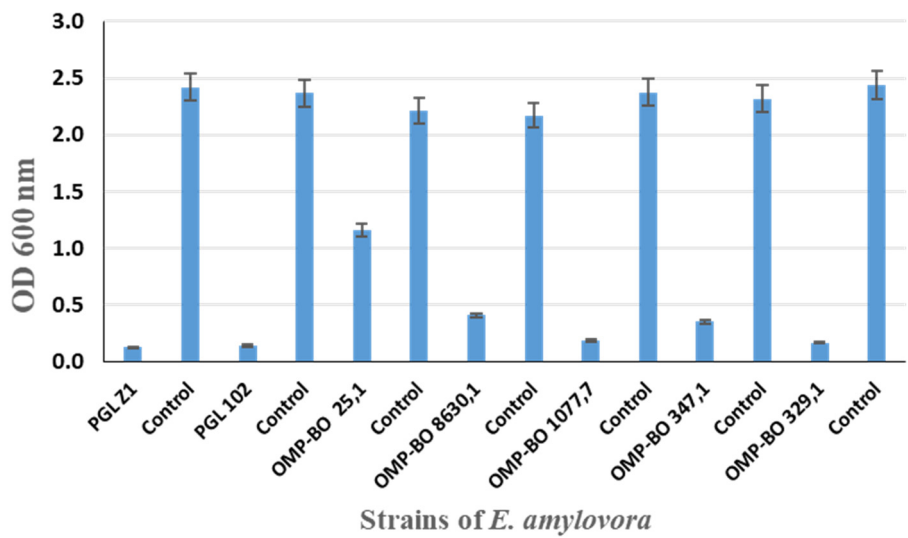

**Figure S3.** qPCR assay performed on DNA extracted from leaves located above the inoculation sites, showing positive reactions for the presence of *E. amylovora*. (A) Untreated-*E. amylovora* infected plants 10 dpi; (B) 20 dpi; (C) 30 dpi; (D) 40 dpi; (E) genomic DNA of *E. amylovora* used as positive control; (F) EP-IT22-treated plants; (G) streptomycin-treated plants; (H) Negative control PCR reaction.

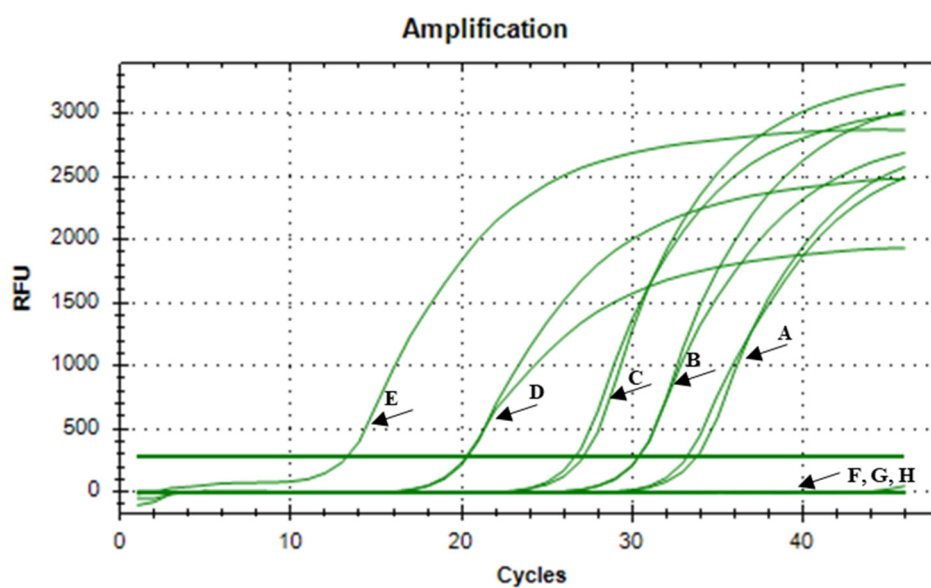

Supplement: s1 [file s1]
